# Supplementary material for: Practical Barriers and Facilitators Experienced by Patients, Pharmacists and Physicians to the Implementation of Pharmacogenomic Screening in Dutch Outpatient Hospital Care—An Explorative Pilot Study
Source: J Pers Med. 2020 Dec 21;10(4):293. doi: 10.3390/jpm10040293 (PMC7767378; doi:10.3390/jpm10040293)
Supplement: Supplementary file 1 [file jpm-10-00293-s001.zip]

Archive with 16 entries (16 files):
- Supplementary Material 1 Patient result letter (English translation).pdf
- __MACOSX/._Supplementary Material 1 Patient result letter (English translation).pdf
- Supplementary Methods.docx
- __MACOSX/._Supplementary Methods.docx
- Supplementary Results.docx
- __MACOSX/._Supplementary Results.docx
- Table S1 Details on custom genotyping panel.docx
- __MACOSX/._Table S1 Details on custom genotyping panel.docx
- Table S2 Overview of the questions included in the surveys.xlsx
- __MACOSX/._Table S2 Overview of the questions included in the surveys.xlsx
- Table S3 Demographics of participating patients, community pharmacists, hospital pharmacists and physicians.docx
- __MACOSX/._Table S3 Demographics of participating patients, community pharmacists, hospital pharmacists and physicians.docx
- Table S4 Frequencies of PGx haplotypes and predicted phenotypes.docx
- __MACOSX/._Table S4 Frequencies of PGx haplotypes and predicted phenotypes.docx
- Table S5 Alphabetical list of abbreviations.docx
- __MACOSX/._Table S5 Alphabetical list of abbreviations.docx
