# Supplementary material for: Practical Barriers and Facilitators Experienced by Patients, Pharmacists and Physicians to the Implementation of Pharmacogenomic Screening in Dutch Outpatient Hospital Care—An Explorative Pilot Study
Source: J Pers Med. 2020 Dec 21;10(4):293. doi: 10.3390/jpm10040293 (PMC7767378; doi:10.3390/jpm10040293)
Supplement: Supplementary file 1 [file jpm-10-00293-s001.zip › Table S2 Overview of the questions included in the surveys.xlsx]

## Sheet: Sheet1
Concept	Question	T1 community pharmacist	T1 patient	T2 patient	T2 hospital pharmacist	T2 physician (with patient in study)	T2 physician (no patient in study)
Application	How well were you able to apply PGx screening results in patient care?	x	x	x	0 = very bad / 1 / 2 / 3 / 4 / 5 / 6 / 7 / 8 / 9 / 10 = very well + explanation in free text field	0 = very bad / 1 / 2 / 3 / 4 / 5 / 6 / 7 / 8 / 9 / 10 = very well + explanation in free text field	x
Application	Should the results of the DNA-test be discussed with the patient?	Yes, this should be discussed by default / Yes, if the patient expresses the need / Yes, if the results have consequences / No	x	x	Yes, this should be discussed by default / Yes, if the patient expresses the need / Yes, if the results have consequences / No	Yes, this should be discussed by default / Yes, if the patient expresses the need / Yes, if the results have consequences / No	Yes, this should be discussed by default / Yes, if the patient expresses the need / Yes, if the results have consequences / No
Application	Did you feel you had sufficient knowledge about PGx in order to communicate about the results of the DNA-test with (patients and) other healthcare practitioners?	x	x	x	Yes / No / I did not communicate about the results	Yes / No / I did not communicate about the results	x
Application	Who initiated the discussing of the results of the DNA-test?	x	x	x	x	Me / my patient	x
Application	How well were you able to answer questions about PGx from patients	x	x	x	x	Very well / well / reasonable / bad / very bad + explanation in free text field	x
Application	Did a question or case remain unanswered or unresolved?	x	x	x	No / Yes (+ explanation) / I did not come into contact with PGx results	No / Yes (+ explanation) / I did not come into contact with PGx results	x
Application	The recommendations I have read were understandable for pharmacists/physicians	x	x	x	Completely disagree / disagree / don't agree, don't disagree / agree / completely agree / not applicable	Completely disagree / disagree / don't agree, don't disagree / agree / completely agree / not applicable	x
Application	I found it hard to come to a decision based on the shown recommendation combined with my own knowledge	x	x	x	Completely disagree / disagree / don't agree, don't disagree / agree / completely agree / not applicable	Completely disagree / disagree / don't agree, don't disagree / agree / completely agree / not applicable	x
Application	The recommendations provided me with sufficient direction to treat my patients well	x	x	x	Completely disagree / disagree / don't agree, don't disagree / agree / completely agree / not applicable	Completely disagree / disagree / don't agree, don't disagree / agree / completely agree / not applicable	x
Application	The recommendations provided me with sufficient direction to start the pharmacotherapy of my patients well	x	x	x	Completely disagree / disagree / don't agree, don't disagree / agree / completely agree / not applicable	Completely disagree / disagree / don't agree, don't disagree / agree / completely agree / not applicable	x
Application	I missed information in the recommendations to continuate the treatment after it was started based on PGx screening results	x	x	x	Completely disagree / disagree / don't agree, don't disagree / agree / completely agree / not applicable	Completely disagree / disagree / don't agree, don't disagree / agree / completely agree / not applicable	x
Application	The recommendations can not be implemented in practice in their current form	x	x	x	Completely disagree / disagree / don't agree, don't disagree / agree / completely agree / not applicable	Completely disagree / disagree / don't agree, don't disagree / agree / completely agree / not applicable	x
Application	PGx regularly was one of the most important clinical factors to decide or guide pharmacotherapy upon	x	x	x	Completely disagree / disagree / don't agree, don't disagree / agree / completely agree / not applicable	Completely disagree / disagree / don't agree, don't disagree / agree / completely agree / not applicable	x
Application	It was hard to decide the place of PGx in respect to other clinical factors (for example kidney function, gender, clinical representation)	x	x	x	Completely disagree / disagree / don't agree, don't disagree / agree / completely agree / not applicable	Completely disagree / disagree / don't agree, don't disagree / agree / completely agree / not applicable	x
Application	Who is finally responsible for the application of PGx?	Pharmacist / GP / clinical geneticist / prescriber, regardless of specialty / other + explanation in free text field	x	x	Pharmacist / GP / clinical geneticist / prescriber, regardless of specialty / other + explanation in free text field	Pharmacist / GP / clinical geneticist / prescriber, regardless of specialty / other + explanation in free text field	Pharmacist / GP / clinical geneticist / prescriber, regardless of specialty / other + explanation in free text field
Application	Which healthcare practitioner should discuss the results of the DNA-test with the patient	Pharmacist / treating physician in hospital / GP / clinical geneticist / other + explanation in free text field	x	x	Pharmacist / treating physician in hospital / GP / clinical geneticist / other + explanation in free text field	Pharmacist / treating physician in hospital / GP / clinical geneticist / other + explanation in free text field	Pharmacist / treating physician in hospital / GP / clinical geneticist / other + explanation in free text field
Application	How well were you able to answer question about PGx from (patients and) other healthcare practitioners?	x	x	x	Very well / well / reasonable / bad / very bad	x	x
Application	Did you discuss the results of the DNA-test with your treating physician in the UMCG?	x	x	No / Yes, this was brought up in a regular appointment / Yes, a separate appointment was made to discuss this	x	x	x
Application	Which healthcare practitioners are you planning to share the results of the DNA-test with? / Which healthcare practitioner did you share the results of the DNA-test with?	x	Pharmacist / GP / physician at another hospital / home nursing / thrombosis care / nursing home / I rather not say / I don't know yet / I'm not going to share these results with healthcare practitioners / other (+ explanation in free text field)	Pharmacist / GP / physician at another hospital / home nursing / thrombosis care / nursing home / I rather not say / I did not share these results with healthcare practitioners / other (+ explanation in free text field)	x	x	x
Application	Perhaps you discussed the results of the DNA-test with one or more healthcare practitioners. If so, can you indicate how these conversations went?	x	x	Healthcare practitioners checkboxes: Pharmacist / GP / UMCG physician / physician at another hospital / home nursing / thrombosis care / nursing home / other (+ explanation in free text field); Answeroptions for each checkbox: Very bad / bad / reasonable / well / very well / not applicable / Free tekst field for explanation	x	x	x
Application	Were you already using drugs prior to receiving the results of the DNA-test?	x	x	Yes / No	x	x	x
Application	Were the drug you already used reviewed in response to the results of the DNA-test?	x	x	Yes / no	x	x	x
Application	Did you want your drug to be reviewed by a healthcare practitioner?	x	x	Yes / No (+ free text field for explanation)	x	x	x
Application	Who initiated the review of your drugs?	x	x	I did / pharmacist / GP / UMCG physician / physician at another hospital / other (+ explanation)	x	x	x
Application	Which healthcare practitioner reviewed your drugs?	x	x	Pharmacist / GP / UMCG physician / physician at another hospital / other (+ explanation)	x	x	x
Application	Has reviewing your drugs led to any changes in your drug use?	x	x	Yes / No / Don't know	x	x	x
Application	What changes have been made in your drug use?	x	x	Dose adjustment / switched to another drug / other (+ explanation) / I do not recall	x	x	x
Application	What was the reason no changes were made in response to the results of the DNA-test?	x	x	No changes needed / my physician did not want to make changes / my pharmacist did not want to make changes / I did not want changes / I do not recall / other (+ explanation)	x	x	x
Application	Were you prescribed any new drugs after you had received the results of the DNA-test?	x	x	Yes / No	x	x	x
Application	Which healthcare practitioner prescribe you these drugs?	x	x	GP / physician in another hospital (+ explanation in free textfield) / UMCG physician (+ department) / other (+ explanation)	x	x	x
Application	I understand when I have to show the results of the DNA-test with a healthcare practitioner	x	Completely disagree / disagree / don't agree, don't disagree / agree / completely agree	x	x	x	x
Application	Are you going to discuss the results of the DNA-test with your treating physician in the UMCG?	x	No / Yes, I will bring it up in the next appointment / Yes, I will schedule a separate appointment to discuss this	x	x	x	x
Application	Should the results of the DNA-test be discussed with you by a healthcare practitioner?	x	Yes, this should be discussed by default / Yes, if I expresses the need / Yes, if the results have consequences / No	x	x	x	x
Application	Which healthcare practitioner should discuss the results of the DNA-test with you?	x	Pharmacist / treating physician in hospital / GP / clinical geneticist / other (+ explanation in free text field)	x	x	x	x
Application	How well do you think you could apply PGx screening results in patient care? (+ explanation)	0 = very bad / 1 / 2 / 3 / 4 / 5 / 6 / 7 / 8 / 9 / 10 = very well ; (+ free text field)	x	x	x	x	0 = very bad / 1 / 2 / 3 / 4 / 5 / 6 / 7 / 8 / 9 / 10 = very well ; (+ free text field)
Application	Right now, what are you planning to do with the results of the DNA-test?	Ask for advice with hospital pharmacy UMCG / discuss with pharmacy technicians / discuss with fellow pharmacist(s) / discuss with patients, archive result letter / register in computer system / adjust drug use / review drug use / initiate formal drug review / include it in next formal drug review / discuss with GP / other + explanation in free text field	x	x	x	x	x
Attitude	I find testing for hereditary characteristics generally frightening	x	Completely disagree / disagree / don't agree, don't disagree / agree / completely agree	Completely disagree / disagree / don't agree, don't disagree / agree / completely agree	x	x	x
Attitude	I find testing for hereditary characteristics to determine my drug sensitivity frightening	x	Completely disagree / disagree / don't agree, don't disagree / agree / completely agree	Completely disagree / disagree / don't agree, don't disagree / agree / completely agree	x	x	x
Attitude	I find it reassuring that my hereditary sensitivity to drugs has been investigated	x	Completely disagree / disagree / don't agree, don't disagree / agree / completely agree	Completely disagree / disagree / don't agree, don't disagree / agree / completely agree	x	x	x
Attitude (readiness)	I am not yet ready to apply PGx in practice	Completely disagree / disagree / don't agree, don't disagree / agree / completely agree	x	x	Completely disagree / disagree / don't agree, don't disagree / agree / completely agree	Completely disagree / disagree / don't agree, don't disagree / agree / completely agree	Completely disagree / disagree / don't agree, don't disagree / agree / completely agree
Attitude (readiness)	I do not need postgraduate education on PGx to be able to apply it in patient care	Completely disagree / disagree / don't agree, don't disagree / agree / completely agree	x	x	Completely disagree / disagree / don't agree, don't disagree / agree / completely agree	Completely disagree / disagree / don't agree, don't disagree / agree / completely agree	Completely disagree / disagree / don't agree, don't disagree / agree / completely agree
Attitude (readiness)	Pharmacy staff is currently sufficiently trained to apply PGx in practice	Completely disagree / disagree / don't agree, don't disagree / agree / completely agree	x	x	Completely disagree / disagree / don't agree, don't disagree / agree / completely agree	x	x
Attitude (utility)	I find it useful to have pharmacogenetic information / I find it useful to know my hereditary sensitivity to drugs	Completely disagree / disagree / don't agree, don't disagree / agree / completely agree	Completely disagree / disagree / don't agree, don't disagree / agree / completely agree	Completely disagree / disagree / don't agree, don't disagree / agree / completely agree	Completely disagree / disagree / don't agree, don't disagree / agree / completely agree	Completely disagree / disagree / don't agree, don't disagree / agree / completely agree	Completely disagree / disagree / don't agree, don't disagree / agree / completely agree
Attitude (utility)	I would like to use pharmacogenetics (more) in the care of my patients (provided that practical preconditions are met)	Completely disagree / disagree / don't agree, don't disagree / agree / completely agree	x	x	Completely disagree / disagree / don't agree, don't disagree / agree / completely agree	Completely disagree / disagree / don't agree, don't disagree / agree / completely agree	Completely disagree / disagree / don't agree, don't disagree / agree / completely agree
Attitude (utility)	I think pharmacogenetics has added value in practice	Completely disagree / disagree / don't agree, don't disagree / agree / completely agree	x	x	Completely disagree / disagree / don't agree, don't disagree / agree / completely agree	Completely disagree / disagree / don't agree, don't disagree / agree / completely agree	Completely disagree / disagree / don't agree, don't disagree / agree / completely agree
Attitude (utility)	I think it is of added value when drugs are adapted to my hereditary characteristics	x	Completely disagree / disagree / don't agree, don't disagree / agree / completely agree	Completely disagree / disagree / don't agree, don't disagree / agree / completely agree	x	x	x
Demographics	In which department do you work	x	x	x	x	Psychiatry / internal medicine (excluding geriatric medicine) / geriatric medicine	Psychiatry / internal medicine (excluding geriatric medicine) / geriatric medicine
Demographics	What is your current position?	x	x	x	x	Medical specialist / medical specialist in training	Medical specialist / medical specialist in training
Demographics	How long did your training as a medical specialist (AIOS) last	x	x	x	x	Integer	Integer
Demographics	How long have you been working in your current position	x	x	x	Integer	Integer	Integer
Demographics	What is your age	Integer	x	x	Integer	Integer	Integer
Demographics	What is your gender	Male/Female	x	x	Male/Female	Male/Female	Male/Female
Demographics	What is your current position in the hospital pharmacy	x	x	x	Hospital pharmacist / hospital pharmacist in training / pharmacist without specialty	x	x
Demographics	At which outpatient clinic(s) of the UMCG are you being treated and what are you being treated for?	x	Psychiatry (+ free text field) / geriatric medicine (+ free text field) / internal medicine (+ free text field)	Psychiatry (+ free text field) / geriatric medicine (+ free text field) / internal medicine (+ free text field)	x	x	x
Demographics	What is the highest education you have completed with a diploma	x	Primary education, special education / Lower vocational education (LBO, VBO) / Secondary general education (mavo, vmbo) / Secondary vocational education (MBO) / Higher general education (havo, vwo, gymnasium) / Higher professional education (HBO) / Scientific education (university) / I have not completed any education / Other (+ explanation in free text field)	x	x	x	x
Demographics	Who ensures that you use the right drugs at the right time	x	I do that independently / I get help from someone else / someone else does that for me / I am not on any medication	x	x	x	x
Demographics	How did you organize the intake of your drugs	x	I have boxes with labels and remember by myself when to take them / I use a special day- or week-box to remember when to take them / I have a baxter roll to remember when to take them / other (+ explanation in free text field)	x	x	x	x
Demographics	What is your position in the pharmacy	Community pharmacist / Community pharmacist in training / Pharmacist without specialty	x	x	x	x	x
Demographics	How long have you been working in community pharmacy	Integer	x	x	x	x	x
Experience	How often have you been exposed to PGx results for a patient so far?	More than 10 times / 5 to 10 times / 1 to 5 times / This is the first time	x	x	More than 10 times / 5 to 10 times / 1 to 5 times / This is the first time	More than 10 times / 5 to 10 times / 1 to 5 times / This is the first time	More than 10 times / 5 to 10 times / 1 to 5 times / This is the first time
Experience	Has a PGx test ever been carried out on your initiative?	Yes / No	x	x	Yes / No	Yes / No	Yes / No
General feedback	Room for remarks	Free text field	Free text field	Free text field	Free text field	Free text field	Free text field
Knowledge and education	Can you indicate your level of knowledge regarding PGx	0 = no knowledge at all / 1 / 2 / 3 / 4 / 5 / 6 / 7 / 8 / 9 / 10 = complete knowledge	x	x	0 = no knowledge at all / 1 / 2 / 3 / 4 / 5 / 6 / 7 / 8 / 9 / 10 = complete knowledge	0 = no knowledge at all / 1 / 2 / 3 / 4 / 5 / 6 / 7 / 8 / 9 / 10 = complete knowledge	0 = no knowledge at all / 1 / 2 / 3 / 4 / 5 / 6 / 7 / 8 / 9 / 10 = complete knowledge
Knowledge and education	Did you receive training outside your training as a medical specialist or educated yourself on the subject of PGx?	x	x	x	x	Yes / No	Yes / No
Knowledge and education	I need further training specifically focused on PGx	x	x	x	Completely disagree / disagree / don't agree, don't disagree / agree / completely agree / not applicable	Completely disagree / disagree / don't agree, don't disagree / agree / completely agree / not applicable	x
Knowledge and education	Did you receive training or educated yourself on the subject of PGx outside your training as a (hospital) pharmacist	x	x	x	Yes / No	x	x
Knowledge and education	Did you receive training or did you educate yourself on the subject of PGx outside your training as a pharmacist	Yes / No	x	x	x	x	x
Provision of information	Do you currently have any unanswered questions after consulting the available information sources?	x	Yes (+ free text field) / No	Yes (+ free text field) / No	x	x	x
Provision of information	Are there any improvements that we can implement in the information provision?	x	x	Yes (+ free text field) / No	x	x	x
Provision of information	Which information sources did you consult (again) since receiving the results of the DNA test?	x	x	Animated video / printed project information / conversation with treating physician / email contact with researchers / phone contact with researchers / project website / other (+ explanation)	x	x	x
Result letter	Have you consulted the result letter in the EHR for at least one patient of this study	x	x	x	Yes / No	Yes / No	x
Result letter	I find the information in the results letter understandable for physicians	x	x	x	x	Completely disagree / disagree / don't agree, don't disagree / agree / completely agree	x
Result letter	I do not understand what the result of the DNA test means for the care I provide	Completely disagree / disagree / don't agree, don't disagree / agree / completely agree	x	x	Completely disagree / disagree / don't agree, don't disagree / agree / completely agree	Completely disagree / disagree / don't agree, don't disagree / agree / completely agree	x
Result letter	Reading the results letter raised questions for me.	Completely disagree / disagree / don't agree, don't disagree / agree / completely agree	Completely disagree / disagree / don't agree, don't disagree / agree / completely agree	x	Completely disagree / disagree / don't agree, don't disagree / agree / completely agree	Completely disagree / disagree / don't agree, don't disagree / agree / completely agree	x
Result letter	I was missing information in the results letter.	Completely disagree / disagree / don't agree, don't disagree / agree / completely agree	Completely disagree / disagree / don't agree, don't disagree / agree / completely agree	x	Completely disagree / disagree / don't agree, don't disagree / agree / completely agree	Completely disagree / disagree / don't agree, don't disagree / agree / completely agree	x
Result letter	About which subject (s) would you like to read more information in the result letter	Free text field	Free text field	x	Free text field	Free text field	x
Result letter	What information in the result letter did you consider unnecessary for physicians	x	x	x	x	Free text field	x
Result letter	Do you currently have any unanswered questions about the result of the DNA test (+ explanation)	Yes / No (+ free text field)	x	x	Yes (+ explanation in free text field) / No	Yes (+ explanation in free text field) / No	x
Result letter	I find the information in the results letter understandable for pharmacists	Completely disagree / disagree / don't agree, don't disagree / agree / completely agree	x	x	Completely disagree / disagree / don't agree, don't disagree / agree / completely agree	x	x
Result letter	What information in the result letter did you consider unnecessary	x	x	x	Free text field	x	x
Result letter	I find the information in the results letter understandable	x	Completely disagree / disagree / don't agree, don't disagree / agree / completely agree	x	x	x	x
Result letter	The language used in the results letter is too difficult	x	Completely disagree / disagree / don't agree, don't disagree / agree / completely agree	x	x	x	x
Result letter	By reading the result letter, I doubt whether my drugs are suitable for me	x	Completely disagree / disagree / don't agree, don't disagree / agree / completely agree	x	x	x	x
Result letter	By reading the result letter I understand what the result of the DNA test means to me	x	Completely disagree / disagree / don't agree, don't disagree / agree / completely agree	x	x	x	x
Result letter	I am concerned about my health after reading the results letter.	x	Completely disagree / disagree / don't agree, don't disagree / agree / completely agree	x	x	x	x
Result letter	I feel less healthy because of the results of the DNA test	x	Completely disagree / disagree / don't agree, don't disagree / agree / completely agree	x	x	x	x
Result letter	Do you currently have any unanswered questions regarding the result letter	x	Yes (+ free text field) / No	x	x	x	x
Result letter	What information in the result letter did you consider unnecessary for pharmacists	Free text field	x	x	x	x	x
